# Supplementary material
Source: publisher figshare collection journal article supplement (https://asha.figshare.com/articles/dataset/_/8637236)
Supplement: Supplementary file 3 [file 1]

## Supplemental Material S3. GoriLLA Group Treatment Fidelity Sample.

### Parent-Child Session #3: The Group Plan

|                     |                                                     |
|---------------------|-----------------------------------------------------|
| Date                |                                                     |
| Rater Initials      |                                                     |
| Interventionists    |                                                     |
| Attendance          | # of Children =<br># of Mothers =<br># of Fathers = |
| Study # of Absences |                                                     |

#### Large Group

| Activity                                                   | Yes | No |
|------------------------------------------------------------|-----|----|
| Welcome activities – snack, review worksheet, gorilla maze |     |    |
| Get to Green GoriLLA Plan with parent                      |     |    |
| Zones Check In*                                            |     |    |
| Review vocabulary “feed the gorilla”                       |     |    |
| Introduce “The Group Plan” concept*                        |     |    |

#### Small Group

| Child Small Group Activity      | Yes | No | Parent Small Group Activity       | Yes | No |
|---------------------------------|-----|----|-----------------------------------|-----|----|
| The Group Plan Lesson and book* |     |    | Group plan concept and discussion |     |    |
| Milk pail obstacle course*      |     |    | Troubleshooting relaxation area   |     |    |
| Egg pass*                       |     |    | Behavior problem solving          |     |    |
|                                 |     |    | Homework review                   |     |    |

#### Parent/Child Pairs

| Activity                                              | Yes | No |
|-------------------------------------------------------|-----|----|
| “Our family and the group plan” worksheet and drawing |     |    |
| The group plan review worksheet                       |     |    |
| Get to Green GoriLLA Plan                             |     |    |

#### Large Group

| Activity         | Yes | No |
|------------------|-----|----|
| Zones check in** |     |    |
| Spotlight friend |     |    |

#### Structured TEACCHing Throughout Session

| Materials and Structure                                                  | Yes | No |
|--------------------------------------------------------------------------|-----|----|
| Children prompted to check picture schedule before each group transition |     |    |
| Banana behavior reinforcement used throughout, prize at the end          |     |    |
| All materials listed on checklist for the day were implemented           |     |    |

#### Quality Indicators

|                     | Clinician A (Child) | Clinician B (Parent) |
|---------------------|---------------------|----------------------|
| Quality/Skill Level |                     |                      |
| Behavior Management |                     |                      |
| Notes:              |                     |                      |

\*The Group Plan concept, book, and activities can be found in Hendrix et al. (2013), pp. 71–88. Review worksheets adapted from this concept.

\*\*Zones check-in adapted from Kuypers (2011), p. 99.

Hendrix, R., Palmer, K., Tarshis, N., & Winner, M. (2013). *The incredible flexible you: A Social Thinking curriculum for the preschool and early elementary years*. Santa Clara, CA: Think Social Publishing.

Kuypers, L. (2011). *The zones of regulation*. Santa Clara, CA: Think Social Publishing.
